1 **The effect of butyrate-supplemented parenteral nutrition**  
2 **on intestinal defence mechanisms and the parenteral**  
3 **nutrition-induced shift in the gut microbiota**

4

5

6 Short title: Butyrate-supplemented parenteral nutrition and intestinal defence mechanisms

7

8 Jirsova Z<sup>1</sup>, Heczko M<sup>1</sup>, Dankova H<sup>1</sup>, Malinska H<sup>1</sup>, Videnska P<sup>2</sup>, Vespalcova H<sup>2</sup>,  
9 Micenkova L<sup>2</sup>, Bartonova L<sup>3</sup>, Sticova E<sup>3</sup>, Lodererova A<sup>3</sup>, Prefertusová L.<sup>3</sup>, Sekerkova A<sup>4</sup>,  
10 Cahova M<sup>1,\*</sup>

11

12 <sup>1</sup>Department of Experimental Medicine, Institute for Clinical and Experimental Medicine,  
13 Prague, CR

14 <sup>2</sup>RECETOX, Faculty of Science, Masaryk University, Brno, CR

15 <sup>3</sup>Clinical and Transplant Pathology Department, Institute for Clinical and Experimental  
16 Medicine, Prague, CR

17 <sup>4</sup>Prevedig, Prague, CR

18

19

20 \* Corresponding author

21 E-mail: monika.cahova@ikem.cz

22

23

24

25

26

27

28

29

30

31

32

33

34

35

## 36 **Abstract**

37 Butyrate produced by the intestinal microbiota is essential for proper functioning of the  
38 intestinal immune system. Total dependence on parenteral nutrition (PN) is associated with  
39 numerous adverse effects, including severe microbial dysbiosis and loss of important butyrate  
40 producers. We hypothesised that a lack of butyrate produced by the gut microbiota may be  
41 compensated by its supplementation in PN mixtures. We tested whether *i.v.* butyrate  
42 administration would (a) positively modulate intestinal defence mechanisms and (b)  
43 counteract PN-induced dysbiosis. Male Wistar rats were randomised to chow, PN, and PN  
44 supplemented with 9 mM butyrate (PN+But) for 12 days. Antimicrobial peptides, mucins,  
45 tight junction proteins and cytokine expression were assessed by RT-qPCR. T-cell  
46 subpopulations in mesenteric lymph nodes (MLN) were analysed by flow cytometry.  
47 Microbiota composition was assessed in caecum content. Butyrate supplementation resulted  
48 in increased expression of tight junction proteins (*ZO-1*, *claudin-7*, *E-cadherin*), antimicrobial  
49 peptides (*Defa 8*, *Rd5*, *RegIIIγ*) and lysozyme in the ileal mucosa. Butyrate partially alleviated  
50 PN-induced intestinal barrier impairment and normalised IL-4, IL-10 and IgA mRNA  
51 expression. PN administration was associated with an increase in Tregs in MLN, which was  
52 normalised by butyrate. Butyrate increased the total number of CD4<sup>+</sup> and decreased a relative  
53 amount of CD8<sup>+</sup> memory T cells in MLN. Lack of enteral nutrition and PN administration led  
54 to a shift in caecal microbiota composition. Butyrate did not reverse the altered expression of  
55 most taxa but did influence the abundance of some potentially beneficial/ pathogenic genera,  
56 which might contribute to its overall beneficial effect.

57

58

59

60

61

62

63

64

65

66

67

## 68 **Introduction**

69 Parenteral nutrition (PN) represents a life-saving treatment in patients with intestinal  
70 failure. However, PN and/or lack of enteral feeding are often associated with serious adverse  
71 effects, including impaired mucosal homeostasis, loss of immune reactivity (1), compromised  
72 intestinal barrier function and generalised sepsis (2).

73 Proper gut barrier function depends on the integrity of physical barriers, i.e. tight  
74 junction proteins and adequate mucin production, sufficient production of antimicrobial  
75 compounds by Paneth cells and maintaining an optimal balance between immune tolerance to  
76 commensal microbiota and the defence against invading pathogens (3). Lack of enteral  
77 feeding significantly affects all of these factors. Paneth cells, which are a specialised type of  
78 epithelial cell, release a spectrum of antimicrobial compounds when exposed to alloantigens  
79 (4). The absence of enteral feeding decreases mRNA and protein expression of typical Paneth  
80 cell antimicrobials like lysozyme, cryptidin-4 and secretory phospholipase A2, thus  
81 compromising their function (5, 6). The data concerning the effect of PN on the function of  
82 Paneth cells are inconclusive, as their antimicrobial functions have been shown to both  
83 increase (3) and decrease (7).

84 Goblet cells (GCs) continuously secrete glycoproteins (mucins) in order to repair and  
85 replace the intestinal mucus barrier (8). Until recently, GCs were considered relatively passive  
86 players in promoting intestinal homeostasis and the host defence. However, recent reports  
87 indicate that GCs are able to sense and respond to danger signals (such as bacterial pathogens)  
88 as well as modulate the composition of the gut microbiome by modifying mucin secretion (9).  
89 In a piglet model of enteral nutrition deprivation, GC expansion was established within a few  
90 days after the start of total or partial PN (10), which might reflect a higher degradation rate of  
91 the mucus layer, a lower rate of mucus secretion, or an altered rate of mucin turnover (11).

92 These data indicate that starvation alters mucus dynamics in the small intestine, which may in  
93 turn affect the intestinal defence capacity (11, 12).

94 The gut microbiota has an irreplaceable role in the maturation of mucosal and systemic  
95 immunity (13-15). Depending on its composition, it may either promote a tolerogenic state in  
96 the intestinal mucosa (16-20) and instigate mechanisms preventing bacterial overgrowth or  
97 induce pro-inflammatory status associated with impaired gut barrier function (21). PN itself,  
98 together with a lack of enteral feeding, generates a significant shift in microbiota composition.  
99 In rodent models, PN and starvation are associated with decreased gut microbiota diversity,  
100 the enrichment of potentially pathogenic and inflammation-promoting species, and the  
101 depletion of beneficial anaerobes (3, 7, 22). Heneghan (7) hypothesises that the PN-associated  
102 shift in the gut microbiota may be part of a causal relationship with attenuated antimicrobial  
103 compound production.

104 As well as interacting directly with the host intestinal and immune cells, the gut  
105 microbiota may affect host intestinal homeostasis via fermentation products. Short-chain fatty  
106 acids (SCFA) have multiple beneficial effects on performance and intestinal health (23).  
107 SCFA are produced by the fermentation of soluble fibre. To target intestinal SCFA  
108 production, an often-used treatment is to supplement the diet with prebiotics (dietary fibre),  
109 probiotics (mostly *Lactobacillaceae* or *Bifidobacteriaceae*) or a combination of both.  
110 Unfortunately, this approach is not applicable to all situations. Particularly PN-dependent  
111 patients with short bowel syndrome often exhibit an increased abundance of *Lactobacillaceae*  
112 as well as a lack of butyrate producers in the gut. Therefore, prebiotic/probiotic  
113 supplementation may result in D-lactate acidosis or *Lactobacillus* sepsis. The alternative to  
114 prebiotic/probiotic treatment is the direct administration of butyrate either *per os* or  
115 intravenously. To our knowledge, no study has been published on the effect of i.v. butyrate on  
116 the microbiota in a PN context. The purpose of this study was to determine whether the

117 supplementation of a nutrition mixture with butyrate (9 mM) in the absence of enteral feeding  
118 would affect immune function and gut microbiota composition. In order to examine this  
119 hypothesis, we used a rat model of total parenteral nutrition and assessed the effect of *i.v.*  
120 butyrate on Paneth cell function, mucin production, intestine-associated immune cells and the  
121 gut microbiome.

122

## 123 **Materials and Methods**

### 124 **Animals and experimental design**

125 Male Wistar rats (Charles River, initial weight 300-325 g) were kept in a temperature-  
126 controlled environment under a 12h light/dark cycle. For PN administration, the right jugular  
127 vein was cannulated with a Dow Corning Silastic drainage catheter (0.037 inch) as previously  
128 described (3). Control animals underwent the same operation. The catheter was flushed daily  
129 with TauroLock HEP-100 (TauroPharm GmbH, Waldbüttelbrunn, Germany). After the  
130 operation, the rats were housed individually and connected to a perfusion apparatus (Instech,  
131 PA, USA), which allows free movement. For the next 48 hours, the rats were given free  
132 access to a standard chow diet (SD, SEMED) and provided Plasmalyte (BAXTER Czech,  
133 Prague, CZ) via the catheter at increasing rates (initial rate: 1 ml/hr; goal rate: 4 ml/hr) in  
134 order to adapt to the increasing fluid load. Two days after the operation, the rats were  
135 randomly divided into three groups. Rats in the experimental groups (PN; PN+But) were  
136 provided PN (205 kcal. kg<sup>-1</sup>. d<sup>-1</sup>; 10 hrs per day; rate 4 ml. hr<sup>-1</sup>; light period), the composition  
137 of which is given in Table S1. In the PN+But group, the PN mixture was supplemented with 9  
138 mM butyrate. PN alone, PN+But or Plasmalyte was administered for 12 days. All experiments  
139 were performed in accordance with the Animal Protection Law of the Czech Republic  
140 311/1997 in compliance with the Principles of Laboratory Animal Care (NIH Guide for the

141 Care and Use of Laboratory Animals, 8<sup>th</sup> edition, 2013) and approved by the Ethical  
142 Committee of the Ministry of Health, CR (approval no. 53/2014).

143

## 144 **Histological evaluation**

145 Tissue samples (distal ileum, proximal colon) were fixed in 4% paraformaldehyde,  
146 embedded in paraffin blocks and routinely processed. Sections cut at 4-6  $\mu\text{m}$  were stained  
147 with haematoxylin/eosin and examined with an Olympus BX41 light microscope.

148

## 149 **Immunohistochemistry**

150 Paraffin sections (4  $\mu\text{m}$ ) were deparaffinised in xylene and rehydrated in graded  
151 ethanol. Endogenous peroxidase was blocked, with proteinase K digestion (Dako, Glostrup,  
152 Denmark) used for antigen retrieval. The primary anti-lysozyme antibody (rabbit polyclonal,  
153 Dako, Glostrup, Denmark) was detected using Histofine Simple Stain Rat MAX PO (Nichirei,  
154 Japan). Lysozyme staining intensity was assessed by two independent blinded observers  
155 (scale 0 to 3), with average scores presented for each group.

156

## 157 **Flow cytometry**

158 Single cell suspensions from mesenteric lymph nodes (MLN) were obtained by gently  
159 fragmenting and filtering the tissues through 100  $\mu\text{m}$  cell strainers (Sigma Aldrich), with  
160 lymphocytes isolated by centrifugation on Ficoll ( $\rho = 1.077 \text{ g/ml}$ , GE Healthcare). Isolated  
161 cells were frozen and stored at  $-80^\circ\text{C}$  until analysis. Prior to staining, the lymphocytes were  
162 thawed and incubated for two hours in RPMI 1640 + 10% FCS, 2mM L-glutamine, 1%  
163 Pen/Strep. Panels for both effector and regulatory T cells were stained simultaneously. First,  
164 cells were surface-stained using the following anti-rat antibodies: anti-CD45-FITC (OX-1,

165 Thermo Fisher Scientific), anti-CD4-BV-786 (OX-35, BD Biosciences), anti-CD8 $\alpha$ -PerCP-  
166 e710 (OX-8, Thermo Fisher Scientific), anti-CD62L-PE (OX-85, SONY) and anti-CD45RC-  
167 Alexa Fluor 647 (OX-22, SONY) for the effector T-cell panel, and anti-CD45-FITC, anti-  
168 CD4-BV-786 and anti-CD25-PE (OX-39, Thermo Fisher Scientific) for the regulatory T-cell  
169 panel. Second, the cells in both panels were fixed and permeabilised using an intracellular  
170 staining kit (Anti-Mouse/Rat Foxp3 Staining Set APC, Thermo Fisher Scientific) either with  
171 Foxp3 antibody (FJK-16s, regulatory T cells) or PBS (effector T cells) in conjunction with  
172 15-min blocking using 2% normal rat serum (regulatory T cells only, Thermo Fisher  
173 Scientific). Immediately after staining with anti-Foxp3 mAb, the lymphocytes were analysed  
174 using the BD LSR II flow cytometer (BD Biosciences).

175

## 176 **RT-qPCR**

177 Pieces of the distal ileum (5-8 cm from the ileocaecal valve) were rapidly dissected,  
178 flushed first with cold saline and then with RNA later, opened along the mesenteric border  
179 and the mucosa was then scraped using a glass slide and immediately frozen in liquid  
180 nitrogen. To determine cytokine expression, Peyer's patches were dissected from the rest of  
181 the ileum. Total RNA was extracted using the RNeasy PowerMicrobiome Kit (Qiagen,  
182 Hilden, Germany). A DNAase step was included to avoid possible DNA contamination. A  
183 standard amount of total RNA (1600 ng) was used to synthesise first-strand cDNA with the  
184 High Capacity RNA-to-cDNA Kit (Applied Biosystems, Foster City, CA, USA). The RT-  
185 PCR amplification mixture (25ul) contained 1 ul template cDNA, SYBR Green Master Mix  
186 buffer (QuantiTect, Qiagen, Hilden, Germany) and 400nM (10 pmol/reaction) of sense and  
187 antisense primers. Primers were designed based on known rat sequences taken from the  
188 GeneBank Graphics database: <https://www.ncbi.nlm.nih.gov>. Primer design was performed  
189 with Primer3 software: <http://www.frodo.wi.mit.edu> (Table 1). The reaction was run on the

190 ViiA 7 Real-Time PCR System (Thermo Fisher Scientific, USA). Results were analysed  
191 using SDS software, ver. 2.3 (Applied Biosystems, Foster City, CA, USA). The expression of  
192 genes of interest was normalised to the housekeeper gene Rplp2 and calculated using the  
193  $\Delta\Delta C_t$  method.

194 **Table 1. Primer sequences (5' - 3').**

|              |                | sense (forward)         | antisense (reverse)      |
|--------------|----------------|-------------------------|--------------------------|
| Defa 8       | NM_001033077.1 | GGTCCAGGCTGATCACATTC    | TTATGTCCTCCCTGGTGTCC     |
| lysozyme     | NM_012771.3    | AAGGCATTTCGAGCATGGGTG   | TGAGAAAGAGACAGTGTGAGCTG  |
| RegIII       | NM_173097.1    | GAGCCTCAGGATTTCTGAG     | TCAAATGAGAGGAAGGAAGG     |
| Muc3         | XM_017598596.1 | CAACGAAGAACAAGAAAACG    | TGGGCTCTTCTGAATCTGG      |
| Muc2         | NM_173097.1    | CCAATATCACCTGCCCTGAC    | AGCAAGAACACCCATGATCC     |
| Fcgbp        | NM_001164657.2 | TCTCCCATGTCCCAACTG      | GTTTGAATTCAGGGGCTCAG     |
| IFN $\gamma$ | NM_138880.2    | CCAAGTTCGAGGTGAACAAC    | CCAGAATTCTTCTTATTGGCACAC |
| IL-10        | NM_012854.2    | CTGCAGGACTTTAAGGGTACTTG | TTCTCACAGGGGAGAAATCG     |
| TNF $\alpha$ | NM_012675.3    | ACGTCGTAGCAAACCACCAAG   | TGTGGGTGAGGAGCACATAG     |
| ZO-1         | NM_001106266.1 | TGTTCTGTGAGTCCTTCAG     | AAGGTGGGAGGATGCTATTG     |
| Cldn7        | NM_031702.1    | CATCGTGGCAGGTCTTGCTG    | GTGCACGGTATGCAGCTTTG     |
| Igha         | NC_005105.4    | ATCCCACCATCTACCCACTGA   | ATTGTTCCAGCGCTCGGCA      |
| IL-4         | NM_201270.1    | CCACGGAGAACGAGCTCATC    | GAGAACCCAGACTTGTCTTCA    |
| Cdh1         | NM_031334.1    | GAAGACCAGGACTTTGATTTG   | TCAGAACCACTCCCCTCATAG    |
| Rplp2        | NM_001030021.1 | TCGCTCAGGGTGTGGCAAG     | AGGCCAAATCCCATGTCGTC     |

195

196 **Determination of microbiota composition**

197 Microbiota composition was determined in caecum content. All samples were frozen at  
198 -20 °C until required. DNA was isolated using the QIAamp PowerFecal DNA Kit (Qiagen).  
199 Extracted DNA was used as a template in amplicon PCR to target the hypervariable V4 region  
200 of the bacterial 16S rRNA gene. A 16S metagenomics library was prepared according to the  
201 Illumina 16S Metagenomic Sequencing Library Preparation protocol, with some



202 modifications described below. Each PCR was performed in triplicate, with the primer pair  
203 consisting of Illumina overhang nucleotide sequences, an inner tag and gene-specific  
204 sequences (forward: TCGTCGGCAGCGTCAGATGTGTATAAGAGACAG-InnerTag-  
205 GTGYCAGCMGCCGCGGTAA; reverse:  
206 GTCTCGTGGGCTCGGAGATGTGTATAAGAGACAGC-InnerTag-  
207 GGACTACNVGGGTWTCTAAT) (24, 25). The Illumina overhang served to ligate the  
208 Illumina index and adapter. Each inner tag – a unique sequence of 7–9 bp – was designed to  
209 differentiate samples into groups. After PCR amplification, triplicates were pooled and the  
210 amplified PCR products determined by gel electrophoresis. PCR clean-up was performed with  
211 Agencourt AMPure XP beads (Beckman Coulter Genomics). Samples with different inner  
212 tags were equimolarly pooled based on fluorometrically measured concentrations using the  
213 Qubit® dsDNA HS Assay Kit (Invitrogen™, USA) and microplate reader (Synergy Mx,  
214 BioTek, USA). Pools were used as a template for the second PCR with Nextera XT indexes  
215 (Illumina, USA). Differently indexed samples were quantified using the KAPA Library  
216 Quantification Complete Kit (Kapa Biosystems, USA) and equimolarly pooled according to  
217 the measured concentration. The prepared library was checked with the 2100 Bioanalyzer  
218 Instrument (Agilent Technologies, USA), with concentrations measured by qPCR shortly  
219 prior to sequencing. The library was diluted to a final concentration of 8 pM with the addition  
220 of 20 % PhiX DNA (Illumina, USA). Sequencing was performed using the Miseq Reagent Kit  
221 v2 according to the manufacturer's instructions (Illumina, USA).

222

## 223 **Data processing and statistical analysis**

224 Sequencing data, i.e. raw sequences, were processed using standard bioinformatic  
225 procedures within QIIME 1.9.1 package (26). In short, these include quality filtering, chimera  
226 removal, open reference clustering and taxonomic identification based on the SILVA 123

227 database and UCLUST algorithm (27). Raw sequences were filtered according to default  
228 quality requirements in QIIME 1.9.1 (-r: 3; -p: 0.75; -n:0; -q:3). Chimeras were detected and  
229 filtered using the UCHIME algorithm with the Gold database. Data were afterwards clustered  
230 at the 97% similarity threshold against SILVA database version 123. Representative  
231 sequences were aligned, and a phylogenetic tree was constructed and taxonomic identity  
232 determined by the USEARCH algorithm. The data were treated as compositional (proportions  
233 of total read count in each sample, non-rarefied) and prior to all statistical analyses were  
234 transformed using centered log-ratio transformation (28). Sequencing data are available from  
235 ENA database under the accession number PRJEB28521. All analyses were performed in R,  
236 version 3.4.2. (29).

237 Gene expression data and flow cytometry data are presented as mean  $\pm$  SD. Statistical  
238 analysis was performed using the Kruskal-Wallis test with multiple comparisons. Differences  
239 were considered statistically significant at the level of  $p < 0.05$ . For testing group pairwise  
240 differences in microbial composition, we applied ANOVA test with Tukey's honest  
241 significance. The statistical analyses were performed on each of the six taxonomy levels  
242 (Phylum, Class, Order, Family, Genus and OTUs) separately. The resulting p-values were  
243 adjusted for multiple hypothesis testing using the Benjamini-Hochberg procedure. Results  
244 were considered significant at  $FDR \leq 10\%$ . Hierarchical clustering with Euclidean distance  
245 and the average-linkage algorithm was used to cluster microbial profiles in the heatmap and  
246 the radar chart.

247

## 248 **Results**

### 249 **Ileal and colonic architecture**

250 Compared with controls, we observed significantly reduced mucosal thickness in the  
251 ileum ( $550 \pm 40$  vs  $746 \pm 28$   $\mu\text{m}$ ,  $p < 0.05$ ) and colon ( $886 \pm 90$  vs  $2750 \pm 110$   $\mu\text{m}$ ,  $p < 0.01$ ) (Fig 1)

252 in rats totally dependent on PN. Butyrate supplementation had no effect on these parameters  
253 (ileum:  $535\pm 32$ ; colon:  $1020\pm 103$   $\mu\text{m}$ ).

254 **Fig 1. Histology of the intestinal mucosa.** Mucosal thickness was assessed in the small  
255 intestine (ileum) and the large intestine (colon). Sections of intestinal tissues were stained  
256 with H&E (magnification x100).

257

## 258 **Butyrate stimulates Paneth cell function**

259 To examine the potential Paneth cell alterations associated with butyrate administration,  
260 we determined the expression of Paneth cell-produced compounds. First, we examined the  
261 expression of lysozyme. Immunohistochemical staining confirmed its presence in Paneth cell  
262 granules in the ileum in all groups (Fig 2). Based on staining intensity, PN administration  
263 substantially increased lysozyme expression compared with controls (Fig 2B).

264 Supplementation of the PN mixture with butyrate resulted in the further elevation of  
265 lysozyme-specific staining intensity (Fig 2C). Corresponding results were obtained at the  
266 mRNA level (Fig 2E). Next, we determined the expression of other antimicrobial peptides,  
267 i.e.  $\alpha$ -defensins (Rd5, Defa8) and RegIII $\gamma$  (Figs 2F-H). Whereas PN alone had no effect, we  
268 found significantly increased expression of all three compounds in the PN+But group. In  
269 conclusion, our data show that supplementation of a PN mixture with butyrate is associated  
270 with increased Paneth cell function, as measured by the expression of antimicrobial peptides.

271 **Fig 2. Host defence peptide proteins and mRNA expression in the ileum.** A-C: Lysozyme  
272 staining, magnification x 200; D: lysozyme staining quantification; E: lysozyme mRNA  
273 expression; F: RD5 mRNA expression; G: Defa8 mRNA expression; H: RegIII $\gamma$  mRNA  
274 expression. mRNA expression is given as a fold change over the control group. Results are  
275 presented using Tukey box-and-whisker plots as quartiles (25%, median, and 75%). \*\*p <0.01  
276 PN vs control; ††p <0.01; †††p <0.001 PN+But vs control; #p <0.05, ###p <0.001 PN+But vs PN.

277

## 278 **Butyrate promotes mucin production**

279 GCs specialise in producing and secreting mucin glycoproteins and other factors to form  
280 a protective mucus layer in the intestine. We assessed their function according to the number  
281 of GCs (normalised as the GC number per 200 enterocytes) and by mRNA expression of three  
282 GC products in the ileum. GC numbers tended to be higher in the PN group compared with  
283 controls, but the difference was not statistically significant ( $53.2 \pm 5$  vs  $44 \pm 9.4$ ,  $p=0.08$ ). The  
284 addition of butyrate resulted in a further increase in abundance ( $63.6 \pm 8.5$ ,  $p<0.01$  vs controls,  
285  $p<0.05$  vs PN). Expression of *Muc2*, the main secretory mucin, increased in the PN group  
286 compared with controls, and was further potentiated by butyrate. *Muc3*, the dominant  
287 transmembrane mucin, was elevated only in the PN+But group. *Fcgbp* expression was not  
288 affected in any group (Fig 3). These data indicate that in response to the absence of enteral  
289 feeding GCs increase activity, and that butyrate supplementation significantly stimulates this  
290 process.

291 **Fig 3. mRNA expression of mucosa-forming genes in the ileum.** A: *Muc2*; B *Muc3*; C:  
292 *Fcgbp*. mRNA expression is given as a fold change over the control group. Results are  
293 presented using Tukey box-and-whisker plots as quartiles (25%, median, and 75%). \* $p<0.05$   
294 PN vs control; \*\* $p<0.01$  PN+But vs control; # $p<0.05$ ; ## $p<0.01$  PN+But vs PN.

295

## 296 **Butyrate alleviates PN-induced small intestinal permeability**

297 The effect of butyrate on small intestinal integrity was assessed by *in vitro* permeability  
298 for HRP and by the expression of tight junction proteins. Ileal segments of both the PN and  
299 PN+But groups were more permeable for HRP compared with controls (Fig 4A). Butyrate  
300 supplementation decreased intestinal permeability compared with the PN group, although it  
301 did not match the control level. The expression of tight junction proteins (*ZO-1*, *claudin-7*, *E-*

302 *cadherin*) was similar in the control and PN groups and significantly increased in the PN+But  
303 group (Figs 4B-D). In summary, these findings support the hypothesis that butyrate alleviates  
304 the detrimental effect of PN on intestinal permeability via the stimulation of tight junction  
305 protein expression.

306 **Fig 4. The effect of butyrate on tight junction proteins mRNA expression and intestinal**  
307 **permeability.** A: *ZO-1* mRNA; B *E-cadherin* mRNA; C *claudin-7* mRNA; D: HRP leakage  
308 *in vitro*. mRNA expression is given as a fold change over the control group. Results are  
309 presented using Tukey box-and-whisker plots as quartiles (25%, median, and 75%). \* $p < 0.05$   
310 PN vs control; †† $p < 0.01$  PN+But vs control; # $p < 0.05$ ; ## $p < 0.01$  PN+But vs PN.

311

## 312 **The effect of butyrate on lymphocyte phenotypes and cytokine**

### 313 **expression**

314 In order to determine the effect of butyrate on gut-associated T-cell subpopulations, we  
315 isolated lymphocytes from MLN and analysed them by flow cytometry (Fig 5). In MLN, PN  
316 alone did not affect the total number of CD4<sup>+</sup> or CD8<sup>+</sup> lymphocytes, CD4<sup>+</sup>/CD8<sup>+</sup> ratio  
317 (2.3±0.5 vs 2.4±0.4) or percentage of different CD8<sup>+</sup> subpopulations, but it did increase the  
318 percentage of CD4<sup>+</sup>Foxp3<sup>+</sup>CD25<sup>+</sup> (Treg). Butyrate supplementation led to a significant rise  
319 in CD4<sup>+</sup> lymphocytes but did not change the total number of CD8<sup>+</sup> lymphocytes, resulting in  
320 an increased CD4<sup>+</sup>/CD8<sup>+</sup> ratio (3.5±0.2).

321 **Fig 5. The effect of butyrate on the distribution of T-cell subpopulations in**  
322 **mesenteric lymph nodes.** A: Total CD4<sup>+</sup> and CD8<sup>+</sup> lymphocyte numbers; B: Tregs  
323 subpopulation. Results are presented using Tukey box-and-whisker plots as quartiles (25%,  
324 median, and 75%). \*\* $p < 0.01$  PN vs control; †† $p < 0.05$  PN+But vs control; ## $p < 0.01$  PN+But vs  
325 PN.

326 In the PN group, we found significant attenuation of IL-10 (Fig 6A) and IL-4 mRNA  
327 (Fig 6B) expression in Peyer's patches as well as IgA mRNA expression (Fig 6C) in the  
328 intestinal mucosa. In the PN+But group, the expression of both cytokines increased to the  
329 levels observed in controls and IgA expression was nearly normalised. Taken together,  
330 butyrate added to a PN mixture is associated with an increase in the total CD4+ lymphocyte  
331 population, normalisation of the Tregs subpopulation in MLN, and an increase in gut mucosal  
332 immunity.

333 **Fig 6. The effect of butyrate on cytokine and IgA mRNA expression.** A: IL-10 expression  
334 in Peyer's patches; B: IL-4 expression in Peyer's patches; C: IgA expression in the intestinal  
335 mucosa. mRNA expression is expressed as a fold change over the control group. Results are  
336 presented using Tukey box-and-whisker plots as quartiles (25%, median, and 75%). \* $p < 0.05$ ,  
337 \*\*\* $p < 0.001$  PN vs control; # $p < 0.05$ ; ## $p < 0.01$  PN+But vs PN.

338

## 339 **The effect of butyrate supplementation on the microbiota**

340 Microbiota composition was assessed via sequencing of the 16S rRNA gene in caecum  
341 content sampled at the time of sacrifice. Alpha diversity was assessed in terms of species  
342 richness (OTU numbers, Chao1 index) or evenness (Shannon index, Simpson index) (Table  
343 2). Caecal microbiota in PN+But group tend to be less diverse compared with control or PN  
344 groups but this tendency reached the statistical significance only when OTUs number is  
345 concerned.

346 **Table 2. Alpha diversity.**

|         | OTUs                   | Chao1     | shannon     | simpson     |
|---------|------------------------|-----------|-------------|-------------|
| control | 477 (180)              | 814 (340) | 6.23 (1.14) | 0.96 (0.03) |
| PN      | 429 (109)              | 726 (289) | 6.04 (1.43) | 0.96 (0.1)  |
| PN+But  | 328 (157) <sup>†</sup> | 583 (288) | 4.53 (3.44) | 0.85 (0.34) |

347 Data are given as median and IQR. <sup>†</sup>  $p < 0.05$  PN+But vs control

348

349 The absence of enteral feeding in combination with PN administration had a significant  
350 effect on gut microbiota composition. At the phylum level, *Proteobacteria* significantly  
351 increased in both PN-dependent groups. Butyrate administration was associated with a  
352 decrease in *Proteobacteria* abundance but this trend did not reached statistical significance.  
353 Butyrate supplementation counteracted the deregulation of *Cyanobacteria* observed in the PN  
354 group (Fig 7).

355 **Fig 7. Microbiota composition in the caecum: phylum level.** Results are presented using  
356 Tukey box-and-whisker plots as quartiles (25%, median, and 75%) and outliers (open circles).  
357 \* $p < 0.05$ , \*\*\* $p < 0.001$  PN vs control; †† $p < 0.05$  PN+But vs control; # $p < 0.05$  PN+But vs PN.

358

359 The distribution pattern of abundant (<1%) bacterial families is shown in Fig 8.  
360 *Porphyromonadaceae* and *Alcaligenaceae* were significantly elevated while the *Clostridiales*  
361 *vadinBB60* was reduced in both PN-dependent groups compared with controls. The  
362 abundance of *Bacteroidaceae*, *Enterobacteriaceae*, *Lachnospiraceae*, and *Lactobacillaceae*  
363 was significantly altered only in one of the PN-dependent groups compared with controls but  
364 the trend was similar, i.e. of the same orientation, in both of them. Butyrate supplementation  
365 had significant effect on the abundance of *Peptococcaceae* and one unidentified taxon  
366 belonging to *Gastranaerophilales*.

367 **Fig 8. Distribution pattern of all abundant (<1%) bacterial families in the caecum.** Lines  
368 show the fold change vs controls, green line represents the null change (controls vs controls).  
369 Bar charts demonstrate the relative abundance (%) of each family. Colour key: green =  
370 controls; black = PN; red = PN+But. The significance ( $p < 0.05$ ) is shown using coloured  
371 boxes above the family names.

372

373 We identified 20 genera that were significantly differently ( $p < 0.05$ ) represented in at  
374 least one of the PN-dependent group compared with controls (Fig 9). Five genera were  
375 deregulated in both the PN and PN+But groups, i.e. *Bacteroides*, *Parabacteroides*, *Alistipes*,  
376 *Parasutterella* (increased) and *Prevotellaceae NK4A214 group* (decreased). Compared with  
377 the PN group, butyrate supplementation resulted in the increased abundance of *Anaerostipes*,  
378 *Lachnospiraceae AC2044 group* and *Roseburia*, but decreased the representation of the  
379 *Prevotellaceae Ga6A1 group* and unidentified bacteria from the *Gastranaerophilales* order.  
380 Similar trend (PN+But < PN) was observed in case of *Desulfovibrio sp.* ( $p=0.055$ ). All  
381 relevant statistical data are shown in Table S2. Our data confirm the profound effect of the  
382 lack of enteral feeding on microbiota composition. Butyrate supplementation counteracted  
383 only some of the alterations.

384 **Fig 9. Heat map showing the fold change (A) and the abundance (%) (B) of genera that**  
385 **were differently ( $p<0.05$ ) represented in at least two groups.** Positive values correspond  
386 with an increase and negative values with a decrease in the first group compared with the  
387 second group. Shades of blue represents fold change decrease while shades of brown  
388 represent fold change increase. Uncoloured fields are not significant at  $p<0.05$ .

389

## 390 **Discussion**

### 391 **Butyrate and non-immune defence systems**

392 In the intestine, the basic line of defence (independent of immune cells) consists of a  
393 tight attachment of epithelial cells mediated by tight junction proteins, a mucin layer secreted  
394 by GCs, host defence peptides produced by Paneth cells, and enterocyte products like RegIII $\gamma$   
395 and Muc3. All of these factors prevent bacteria from coming into contact with the sub-  
396 epithelial layer and thus inducing the inflammatory response. PN administration disturbs these  
397 systems (6, 7, 10, 30-33), resulting in the increased exposure of antigens to the immune



398 system, increased intestinal permeability, and the establishment of pro-inflammatory status in  
399 the intestine.

400 Although there is abundant evidence (obtained both *in vitro* and *in vivo*) that butyrate  
401 affects all components of this defence system, the mechanism is not yet fully understood and  
402 controversies remain. Muc 2, secreted by GCs, is the major structural component of the  
403 intestinal mucus. Muc 3 is a transmembrane mucin produced by enterocytes and the major  
404 component of glycocalyx, which plays an active role in the intestinal mucosal defence (34).  
405 Studies published thus far have only focused on the effect of butyrate on mucin production  
406 when administered per rectum or in cell lines *in vitro*; furthermore, these results are rather  
407 inconsistent (35, 36). Gaudier (37) reported that, *in vitro*, butyrate grossly stimulated Muc2  
408 expression but only in a glucose-deprived medium, while the effect of butyrate was dose-  
409 dependent and inhibitory at higher concentrations. These findings indicate that the effect of  
410 butyrate on mucus formation is context-dependent. The stimulatory effect of butyrate on host  
411 defence peptides and tight junction protein expression has been proved both *in vitro* and after  
412 dietary supplementation *in vivo* (38-42). Nevertheless, to our knowledge, no study has  
413 evaluated the effect of butyrate administered parenterally. Our data show that  
414 supplementation of a PN mixture with butyrate at a concentration within physiological limits  
415 (9 mM) upregulates the expression of all components of the non-immune defence – including  
416 mucins, host defence peptides and tight junction proteins in the ileum – while also improving  
417 intestinal permeability. We conclude that enforcement of the intestinal barrier may represent  
418 one of the beneficial effects of i.v. butyrate in the context of total dependence on PN and the  
419 absence of enteral nutrition and/or butyrate producers.

420

421 **Butyrate and immune functions**

422 Total dependence on PN in critically ill patients is accompanied by decreased immune  
423 responsiveness, reduced gut-associated lymphoid tissue (GALT) mass, diminished IgA  
424 secretion, and increased risk of generalised sepsis (43). Nevertheless, it seems that the main  
425 factor responsible for immune dysfunction in PN-dependent patients is not PN administration  
426 itself, but the lack of enteral feeding (1). One consequence of the absence of enterally  
427 provided nutrients is low SCFA content in the gut. SCFA and, in particular, butyrate have  
428 been shown to influence immune cells towards anti-inflammatory and tolerogenic phenotypes  
429 (44) and to induce the differentiation of Foxp3<sup>+</sup> Treg lymphocytes (45). In mice, an SCFA  
430 mixture administered *per os* increased the numbers of IgA-secreting lamina propria B cells,  
431 IgA expression or levels of secreted IgA in various compartments of the intestine, and IgA  
432 and IgG levels in the blood circulation (46). To our knowledge, only one study has focused on  
433 the effect of butyrate when added to PN on GALT. In mice, butyrate partially restored a PN-  
434 induced drop in lymphocyte numbers in Peyer's patches and intestinal IgA levels (47). In our  
435 study, butyrate supplementation was associated with an increase in CD4<sup>+</sup> lymphocyte  
436 numbers, and an increase in the CD4<sup>+</sup>/CD8<sup>+</sup> ratio in MLN. Rather surprisingly, we observed  
437 an increase of Tregs in MLN of rats administered a PN mixture without butyrate, while the  
438 addition of butyrate resulted in a decrease in Tregs percentage to the control level. Treg cells  
439 expressing transcription factor Foxp3 are believed to play a key role in limiting inflammatory  
440 responses in the intestine (48), as they inhibit bystander T-cell activation either by a contact-  
441 dependent mechanism or through soluble factors (49). Paradoxically, Foxp3<sup>+</sup> Tregs are more  
442 common in the inflamed intestinal mucosa of IBD patients, leading to a reciprocal drop in  
443 circulating Treg frequency in the peripheral blood; this likely reflects sequestration of these  
444 cells to the site of inflammation (50, 51). In a rat sepsis model, the pro-survival treatment was  
445 associated with a decrease in spleen Tregs (52) and in septic patients the persistence of  
446 elevated Treg indicated poor outcomes (53). We hypothesise that in our experimental setting

447 decreased Treg frequency in MLN in the PN+But group reflects the lower inflammatory  
448 status of the intestinal epithelium, thus reducing the need to produce an anti-inflammatory  
449 response.

450 IgA production by plasmatic B cells in the submucosal layer is regulated by Th1 and  
451 Th2 cytokines produced by different T-helper subpopulations. While Th1 cytokines (IFN $\gamma$ )  
452 downregulate IgA production, Th2 cytokines (IL-4, IL-5, IL-6, and IL-10) stimulate it (54).  
453 Hanna (55) reported that PN depressed both IL-4 and IL-10 levels in small intestine  
454 homogenates but that IFN $\gamma$  levels remained unchanged, resulting in an imbalance between  
455 pro-/anti-IgA-regulating cytokines and a subsequent reduction in IgA production. Our data  
456 confirm this observation concerning the effect of non-supplemented PN. Butyrate  
457 supplementation resulted in increases in IL-4 and IL-10 expression to control levels and the  
458 near normalisation of IgA expression. These data suggest that intraepithelial Th2 helpers are  
459 one of the targets of butyrate and that butyrate supplementation may restore the PN-induced  
460 cytokine imbalance.

461

## 462 **Butyrate and the microbiota**

463 The gut microbiome in animal models of PN is characterised by a significant shift in  
464 microbiota composition, particularly a loss of *Firmicutes* and an enrichment of *Bacteroidetes*  
465 and *Proteobacteria* (3, 7). In our study, we observed a shift towards an unfavourable  
466 microbiota composition, particularly an enrichment of *Proteobacteria* and the reduction of  
467 bacteria involved in butyrate production (*Lactobacillaceae* or *Lachnospiraceae*) in both PN-  
468 dependent groups. While the abundance of butyrate producers was not affected by butyrate  
469 supplementation we observed a trend, albeit not statistically significant, towards  
470 *Proteobacteria* reduction in butyrate-administered animals. Interestingly, butyrate

471 supplementation (but not enteral deprivation/PN administration alone) was associated with a  
472 tendency to the loss of diversity.

473         Although the effects of dietary fibre on the gut microbiota have been described  
474 elsewhere (56), information concerning the direct effect of butyrate on the gut microbiota is  
475 scarce. Dietary butyrate was reported to reduce coliform bacteria (57) and to increase the  
476 abundance of *Lactobacillus* (42, 58) and butyrate producers *Blautia* and *Anaerostipes* (42).  
477 We observed no radical effect of *i.v.* butyrate, as it did not attenuate deregulation of the main  
478 contributors to PN-induced dysbiosis. Nevertheless, butyrate supplementation has been  
479 associated with an increased abundance of several potentially beneficial genera (*Anaerostipes*,  
480 *Roseburia*, *Lachnospiraceae AC2044 group*), a decreased abundance in the opportunistic  
481 human pathogen *Desulfovibrio* (59) and a trend towards attenuation in *Proteobacteria*  
482 dominance. We suggest that this subtle shift in microbiota composition may contribute, along  
483 with other mechanisms, to the overall beneficial effect of butyrate.

484

## 485 **Conclusion**

486         We report that supplementation of a PN mixture with butyrate resulted in a significant  
487 enhancement of gut defence systems, i.e. increased expression of mucins, tight junction  
488 proteins and host defence peptides, and improvement of PN-induced aggravation of intestinal  
489 permeability. Lack of enteral nutrition and/or PN administration led to a shift in caecal  
490 microbiota composition. Although butyrate did not reverse the altered expression of most  
491 taxa, it did influence the abundance of several potentially beneficial or pathogenic genera  
492 what might contribute to its overall advantageous effect. We conclude that supplementation of  
493 a PN mixture with butyrate may represent a prospective therapeutic approach for mitigating  
494 the adverse effects of parenteral nutrition.

495

## 496 **Supporting information**

497 Table S1. Composition of parenteral nutrition mixture

498 Table S2. Statistical analysis of sequencing data

499

## 500 **Author Contributions**

501 **Conceptualization:** Monika Cahova

502 **Data curation:** Petra Videnska, Zuzana Jirsova, Monika Cahova

503 **Funding acquisition:** Monika Cahova

504 **Investigation:** Zuzana Jirsova, Marie Heczkova, Helena Dankova, Hana Vespalcova, Lenka  
505 Micenkova, Lenka Bartonova, Alena Lodererova, Alena Sekerkova

506 **Validation:** Lucia Prefertusová, Hana Malinska Eva Sticova, Petra Videnska

507 **Visualization:** Helena Dankova, Hana Vespalcova,

508 **Writing ± original draft:** Zuzana Jirsova, Petra Videnska, Marie Heczkova, Monika Cahova

509 **Writing ± review & editing:** Zuzana Jirsova, Petra Videnska, Monika Cahova

510

## 511 **References**

512 1. Wildhaber BE, Yang H, Spencer AU, Drongowski RA, Teitelbaum DH. Lack of  
513 enteral nutrition--effects on the intestinal immune system. *J Surg Res.* 2005;123(1):8-16.

514 2. Alverdy JC, Aoys E, Moss GS. Total parenteral nutrition promotes bacterial  
515 translocation from the gut. *Surgery.* 1988;104(2):185-90.

516 3. Hodin CM, Visschers RG, Rensen SS, Boonen B, Olde Damink SW, Lenaerts K, et al.  
517 Total parenteral nutrition induces a shift in the Firmicutes to Bacteroidetes ratio in association  
518 with Paneth cell activation in rats. *J Nutr.* 2012;142(12):2141-7.

519 4. Iida T, Onodera K, Nakase H. Role of autophagy in the pathogenesis of inflammatory  
520 bowel disease. *World J Gastroenterol.* 2017;23(11):1944-53.

521 5. Hodin CM, Lenaerts K, Grootjans J, de Haan JJ, Hadfoune M, Verheyen FK, et al.  
522 Starvation compromises Paneth cells. *Am J Pathol.* 2011;179(6):2885-93.

- 523 6. Pierre JF, Heneghan AF, Tsao FH, Sano Y, Jonker MA, Omata J, et al. Route and type  
524 of nutrition and surgical stress influence secretory phospholipase A2 secretion of the murine  
525 small intestine. *JPEN J Parenter Enteral Nutr.* 2011;35(6):748-56.
- 526 7. Heneghan AF, Pierre JF, Tandee K, Shanmuganayagam D, Wang X, Reed JD, et al.  
527 Parenteral nutrition decreases paneth cell function and intestinal bactericidal activity while  
528 increasing susceptibility to bacterial enteroinvasion. *JPEN J Parenter Enteral Nutr.*  
529 2014;38(7):817-24.
- 530 8. Adler KB, Tuvim MJ, Dickey BF. Regulated mucin secretion from airway epithelial  
531 cells. *Front Endocrinol (Lausanne).* 2013;4:129.
- 532 9. Allaire JM, Morampudi V, Crowley SM, Stahl M, Yu H, Bhullar K, et al. Frontline  
533 defenders: goblet cell mediators dictate host-microbe interactions in the intestinal tract during  
534 health and disease. *Am J Physiol Gastrointest Liver Physiol.* 2018;314(3):G360-G77.
- 535 10. Conour JE, Ganessunker D, Tappenden KA, Donovan SM, Gaskins HR. Acidomucin  
536 goblet cell expansion induced by parenteral nutrition in the small intestine of piglets. *Am J*  
537 *Physiol Gastrointest Liver Physiol.* 2002;283(5):G1185-96.
- 538 11. Smirnov A, Sklan D, Uni Z. Mucin dynamics in the chick small intestine are altered  
539 by starvation. *J Nutr.* 2004;134(4):736-42.
- 540 12. Zhou Q, Cadrin M, Herrmann H, Chen CH, Chalkley RJ, Burlingame AL, et al.  
541 Keratin 20 serine 13 phosphorylation is a stress and intestinal goblet cell marker. *J Biol*  
542 *Chem.* 2006;281(24):16453-61.
- 543 13. Mazmanian SK, Liu CH, Tzianabos AO, Kasper DL. An immunomodulatory molecule  
544 of symbiotic bacteria directs maturation of the host immune system. *Cell.* 2005;122(1):107-  
545 18.

- 546 14. Christensen HR, Frokiaer H, Pestka JJ. Lactobacilli differentially modulate expression  
547 of cytokines and maturation surface markers in murine dendritic cells. *J Immunol.*  
548 2002;168(1):171-8.
- 549 15. Ivanov, II, Frutos Rde L, Manel N, Yoshinaga K, Rifkin DB, Sartor RB, et al. Specific  
550 microbiota direct the differentiation of IL-17-producing T-helper cells in the mucosa of the  
551 small intestine. *Cell Host Microbe.* 2008;4(4):337-49.
- 552 16. Iwasaki A, Kelsall BL. Freshly isolated Peyer's patch, but not spleen, dendritic cells  
553 produce interleukin 10 and induce the differentiation of T helper type 2 cells. *J Exp Med.*  
554 1999;190(2):229-39.
- 555 17. Kelsall BL, Leon F. Involvement of intestinal dendritic cells in oral tolerance,  
556 immunity to pathogens, and inflammatory bowel disease. *Immunol Rev.* 2005;206:132-48.
- 557 18. Kelly D, Campbell JI, King TP, Grant G, Jansson EA, Coutts AG, et al. Commensal  
558 anaerobic gut bacteria attenuate inflammation by regulating nuclear-cytoplasmic shuttling of  
559 PPAR-gamma and RelA. *Nat Immunol.* 2004;5(1):104-12.
- 560 19. Lee J, Mo JH, Katakura K, Alkalay I, Rucker AN, Liu YT, et al. Maintenance of  
561 colonic homeostasis by distinctive apical TLR9 signalling in intestinal epithelial cells. *Nat*  
562 *Cell Biol.* 2006;8(12):1327-36.
- 563 20. Beutler B, Rietschel ET. Innate immune sensing and its roots: the story of endotoxin.  
564 *Nat Rev Immunol.* 2003;3(2):169-76.
- 565 21. Demehri FR, Barrett M, Teitelbaum DH. Changes to the Intestinal Microbiome With  
566 Parenteral Nutrition: Review of a Murine Model and Potential Clinical Implications. *Nutr*  
567 *Clin Pract.* 2015;30(6):798-806.
- 568 22. Miyasaka EA, Feng Y, Poroyko V, Falkowski NR, Erb-Downward J, Gilliland MG,  
569 3rd, et al. Total parenteral nutrition-associated lamina propria inflammation in mice is  
570 mediated by a MyD88-dependent mechanism. *J Immunol.* 2013;190(12):6607-15.

- 571 23. Guilloteau P, Martin L, Eeckhaut V, Ducatelle R, Zabielski R, Van Immerseel F. From  
572 the gut to the peripheral tissues: the multiple effects of butyrate. *Nutr Res Rev.*  
573 2010;23(2):366-84.
- 574 24. Apprill A, McNally S, Parsons R, Weber L. Minor revision to V4 region SSU rRNA  
575 806R gene primer greatly increases detection of SAR11 bacterioplankton. *Aquat Microb Ecol.*  
576 2015;75(2):129-37.
- 577 25. Caporaso JG, Lauber CL, Walters WA, Berg-Lyons D, Lozupone CA, Turnbaugh PJ,  
578 et al. Global patterns of 16S rRNA diversity at a depth of millions of sequences per sample.  
579 *Proc Natl Acad Sci U S A.* 2011;108 Suppl 1:4516-22.
- 580 26. Caporaso JG, Kuczynski J, Stombaugh J, Bittinger K, Bushman FD, Costello EK, et  
581 al. QIIME allows analysis of high-throughput community sequencing data. *Nat Methods.*  
582 2010;7(5):335-6.
- 583 27. Edgar RC. Search and clustering orders of magnitude faster than BLAST.  
584 *Bioinformatics.* 2010;26(19):2460-1.
- 585 28. Aitchison J. *The Statistical Analysis of Compositional Data (Monographs on Statistics*  
586 *and Applied Probability)*. London: Chapman & Hall Ltd.; 1986. 416 p.
- 587 29. R Core Team (2017). *R: A language and environment for statistical computing.*  
588 Vienna, Austria: R Foundation for Statistical Computing.
- 589 30. Busch RA, Heneghan AF, Pierre JF, Neuman JC, Reimer CA, Wang X, et al.  
590 Bombesin Preserves Goblet Cell Resistin-Like Molecule beta During Parenteral Nutrition but  
591 Not Other Goblet Cell Products. *JPEN J Parenter Enteral Nutr.* 2016;40(7):1042-9.
- 592 31. Wang J, Tian F, Zheng H, Tian H, Wang P, Zhang L, et al. N-3 polyunsaturated fatty  
593 acid-enriched lipid emulsion improves Paneth cell function via the IL-22/Stat3 pathway in a  
594 mouse model of total parenteral nutrition. *Biochem Biophys Res Commun.* 2017;490(2):253-  
595 9.



- 596 32. Omata J, Pierre JF, Heneghan AF, Tsao FH, Sano Y, Jonker MA, et al. Parenteral  
597 nutrition suppresses the bactericidal response of the small intestine. *Surgery*. 2013;153(1):17-  
598 24.
- 599 33. Sun X, Yang H, Nose K, Nose S, Haxhija EQ, Koga H, et al. Decline in intestinal  
600 mucosal IL-10 expression and decreased intestinal barrier function in a mouse model of total  
601 parenteral nutrition. *Am J Physiol Gastrointest Liver Physiol*. 2008;294(1):G139-47.
- 602 34. Shekels LL, Ho SB. Characterization of the mouse Muc3 membrane bound intestinal  
603 mucin 5' coding and promoter regions: regulation by inflammatory cytokines. *Biochim*  
604 *Biophys Acta*. 2003;1627(2-3):90-100.
- 605 35. Hamer HM, Jonkers DM, Renes IB, Vanhoutvin SA, Kodde A, Troost FJ, et al.  
606 Butyrate enemas do not affect human colonic MUC2 and TFF3 expression. *Eur J*  
607 *Gastroenterol Hepatol*. 2010;22(9):1134-40.
- 608 36. Jiminez JA, Uwiera TC, Abbott DW, Uwiera RRE, Inglis GD. Butyrate  
609 Supplementation at High Concentrations Alters Enteric Bacterial Communities and Reduces  
610 Intestinal Inflammation in Mice Infected with *Citrobacter rodentium*. *mSphere*. 2017;2(4).
- 611 37. Gaudier E, Jarry A, Blottiere HM, de Coppet P, Buisine MP, Aubert JP, et al. Butyrate  
612 specifically modulates MUC gene expression in intestinal epithelial goblet cells deprived of  
613 glucose. *Am J Physiol-Gastr L*. 2004;287(6):G1168-G74.
- 614 38. Cresci GA, Glueck B, McMullen MR, Xin W, Allende D, Nagy LE. Prophylactic  
615 tributyrin treatment mitigates chronic-binge ethanol-induced intestinal barrier and liver injury.  
616 *J Gastroenterol Hepatol*. 2017;32(9):1587-97.
- 617 39. Dou X, Han J, Song W, Dong N, Xu X, Zhang W, et al. Sodium butyrate improves  
618 porcine host defense peptide expression and relieves the inflammatory response upon Toll-  
619 like receptor 2 activation and histone deacetylase inhibition in porcine kidney cells.  
620 *Oncotarget*. 2017;8(16):26532-51.

- 621 40. Sunkara LT, Achanta M, Schreiber NB, Bommineni YR, Dai G, Jiang W, et al.  
622 Butyrate enhances disease resistance of chickens by inducing antimicrobial host defense  
623 peptide gene expression. *PLoS One*. 2011;6(11):e27225.
- 624 41. Xiong H, Guo B, Gan Z, Song D, Lu Z, Yi H, et al. Butyrate upregulates endogenous  
625 host defense peptides to enhance disease resistance in piglets via histone deacetylase  
626 inhibition. *Sci Rep*. 2016;6:27070.
- 627 42. Zhou D, Pan Q, Xin FZ, Zhang RN, He CX, Chen GY, et al. Sodium butyrate  
628 attenuates high-fat diet-induced steatohepatitis in mice by improving gut microbiota and  
629 gastrointestinal barrier. *World J Gastroenterol*. 2017;23(1):60-75.
- 630 43. Pierre JF. Gastrointestinal immune and microbiome changes during parenteral  
631 nutrition. *Am J Physiol Gastrointest Liver Physiol*. 2017;312(3):G246-G56.
- 632 44. Rooks MG, Garrett WS. Gut microbiota, metabolites and host immunity. *Nat Rev*  
633 *Immunol*. 2016;16(6):341-52.
- 634 45. Arpaia N, Campbell C, Fan X, Dikiy S, van der Veecken J, deRoos P, et al. Metabolites  
635 produced by commensal bacteria promote peripheral regulatory T-cell generation. *Nature*.  
636 2013;504(7480):451-5.
- 637 46. Kim M, Qie Y, Park J, Kim CH. Gut Microbial Metabolites Fuel Host Antibody  
638 Responses. *Cell Host Microbe*. 2016;20(2):202-14.
- 639 47. Murakoshi S, Fukatsu K, Omata J, Moriya T, Noguchi M, Saitoh D, et al. Effects of  
640 adding butyric acid to PN on gut-associated lymphoid tissue and mucosal immunoglobulin A  
641 levels. *JPEN J Parenter Enteral Nutr*. 2011;35(4):465-72.
- 642 48. Josefowicz SZ, Niec RE, Kim HY, Treuting P, Chinen T, Zheng Y, et al.  
643 Extrathymically generated regulatory T cells control mucosal TH2 inflammation. *Nature*.  
644 2012;482(7385):395-9.

- 645 49. Lord JD. Promises and paradoxes of regulatory T cells in inflammatory bowel disease.  
646 World J Gastroenterol. 2015;21(40):11236-45.
- 647 50. Maul J, Loddenkemper C, Mundt P, Berg E, Giese T, Stallmach A, et al. Peripheral  
648 and intestinal regulatory CD4+ CD25(high) T cells in inflammatory bowel disease.  
649 Gastroenterology. 2005;128(7):1868-78.
- 650 51. Lord JD, Valliant-Saunders K, Hahn H, Thirlby RC, Ziegler SF. Paradoxically  
651 increased FOXP3+ T cells in IBD do not preferentially express the isoform of FOXP3 lacking  
652 exon 2. Dig Dis Sci. 2012;57(11):2846-55.
- 653 52. Cao S, Ren J, Sun L, Gu G, Yuan Y, Li J. Fish oil-supplemented parenteral nutrition  
654 prolongs survival while beneficially altering phospholipids' Fatty Acid composition and  
655 modulating immune function in rat sepsis. Shock. 2011;36(2):184-90.
- 656 53. Venet F, Chung CS, Monneret G, Huang X, Horner B, Garber M, et al. Regulatory T  
657 cell populations in sepsis and trauma. J Leukoc Biol. 2008;83(3):523-35.
- 658 54. Kramer DR, Sutherland RM, Bao S, Husband AJ. Cytokine mediated effects in  
659 mucosal immunity. Immunol Cell Biol. 1995;73(5):389-96.
- 660 55. Hanna MK, Kudsk KA. Nutritional and pharmacological enhancement of gut-  
661 associated lymphoid tissue. Can J Gastroenterol. 2000;14 Suppl D:145D-51D.
- 662 56. Whelan K. Mechanisms and effectiveness of prebiotics in modifying the  
663 gastrointestinal microbiota for the management of digestive disorders. Proc Nutr Soc.  
664 2013;72(3):288-98.
- 665 57. Galfi P, Bokori J. Feeding trial in pigs with a diet containing sodium n-butyrate. Acta  
666 Vet Hung. 1990;38(1-2):3-17.
- 667 58. Jellbauer S, Raffatellu M. An intestinal arsonist: pathobiont ignites IBD and flees the  
668 scene. Gut. 2014;63(7):1034-5.

669 59. Verstreken I, Laleman W, Wauters G, Verhaegen J. *Desulfovibrio desulfuricans*  
670 bacteremia in an immunocompromised host with a liver graft and ulcerative colitis. *J Clin*  
671 *Microbiol.* 2012;50(1):199-201.  
672

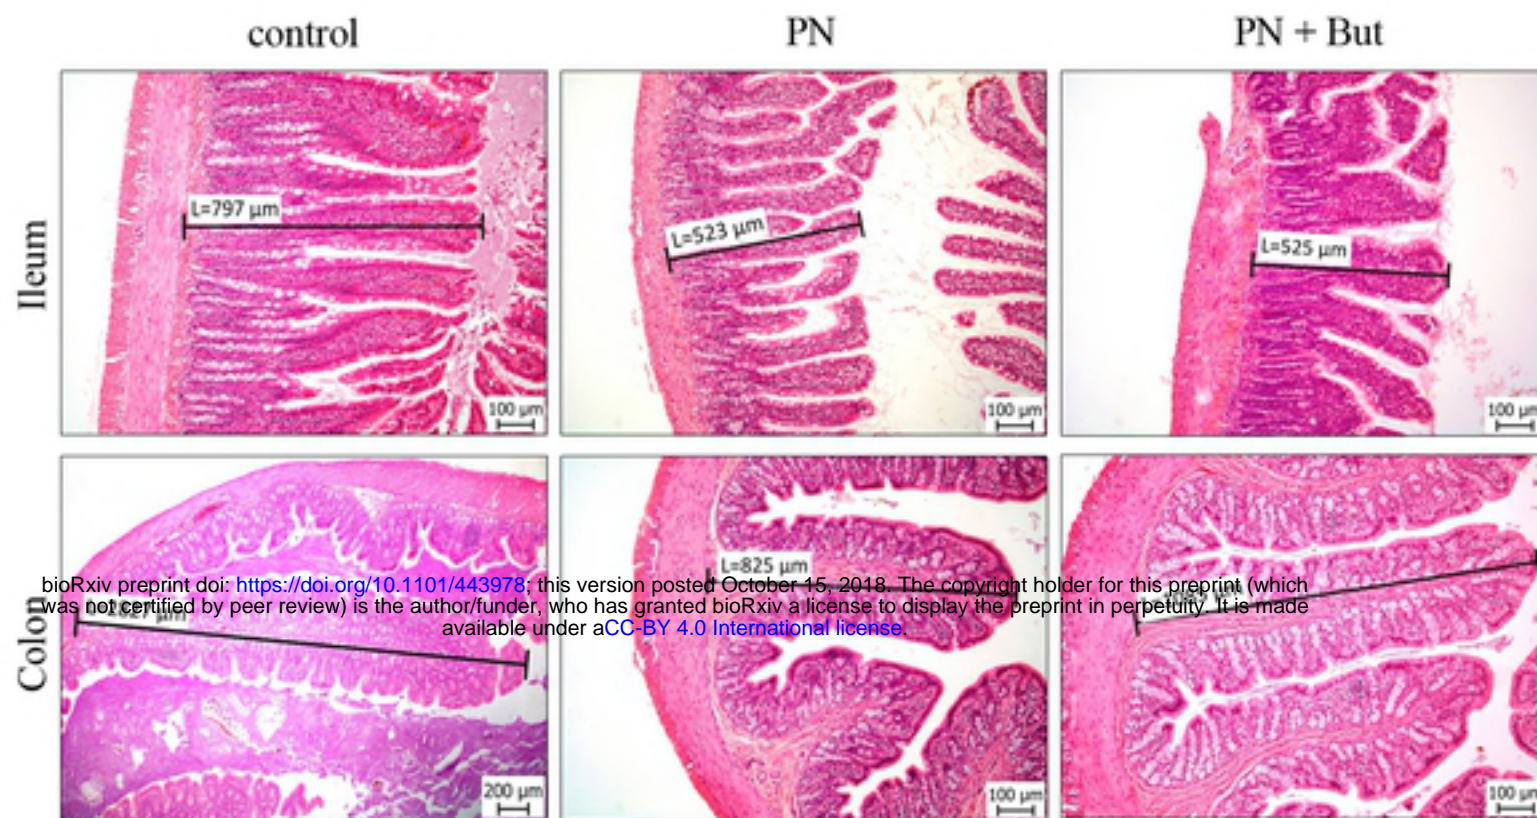

Figure 1

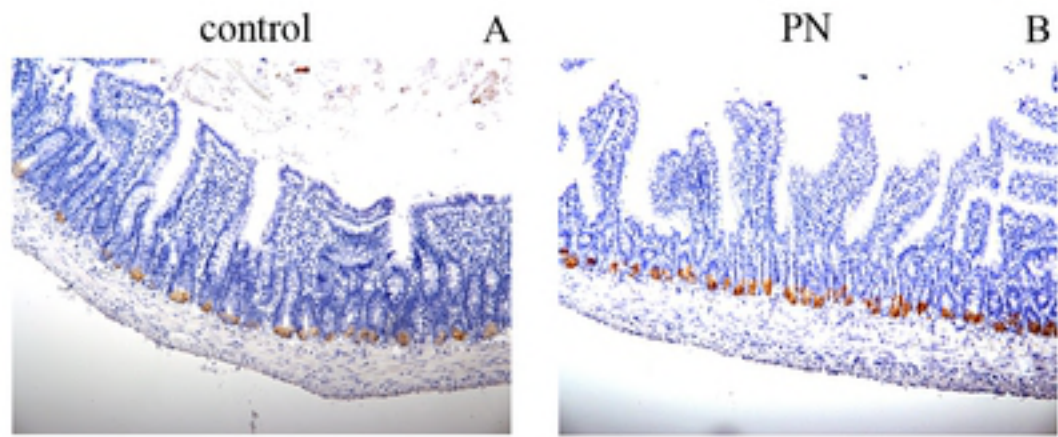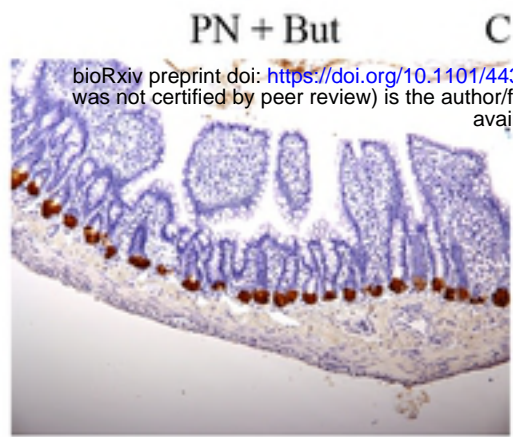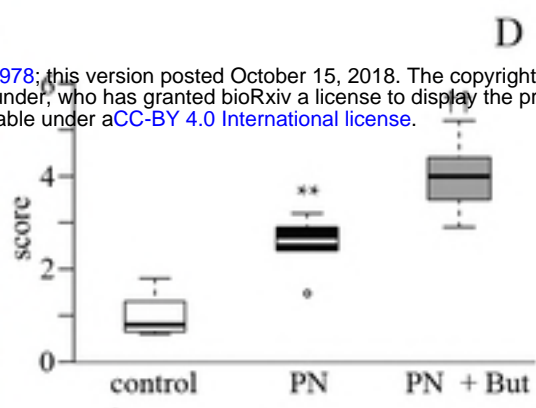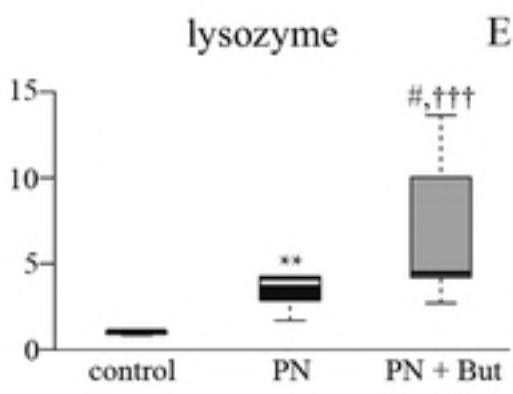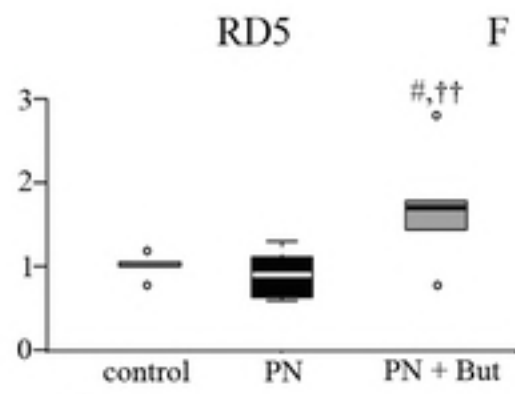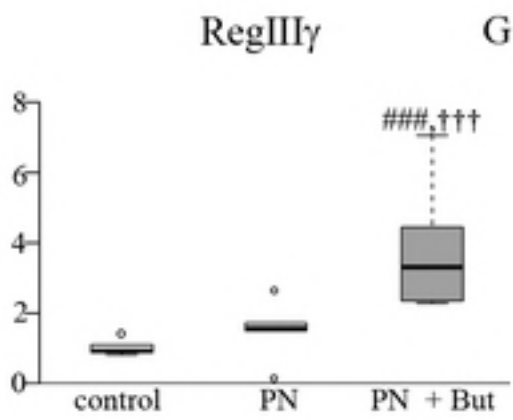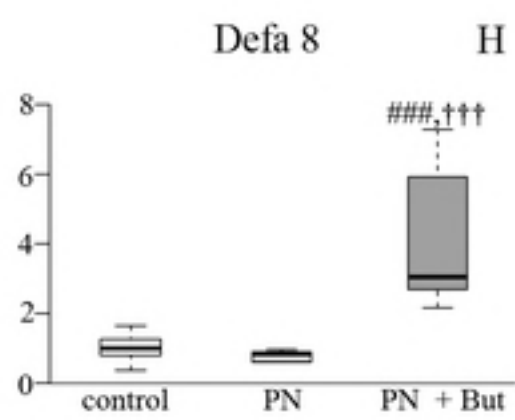

Figure 2

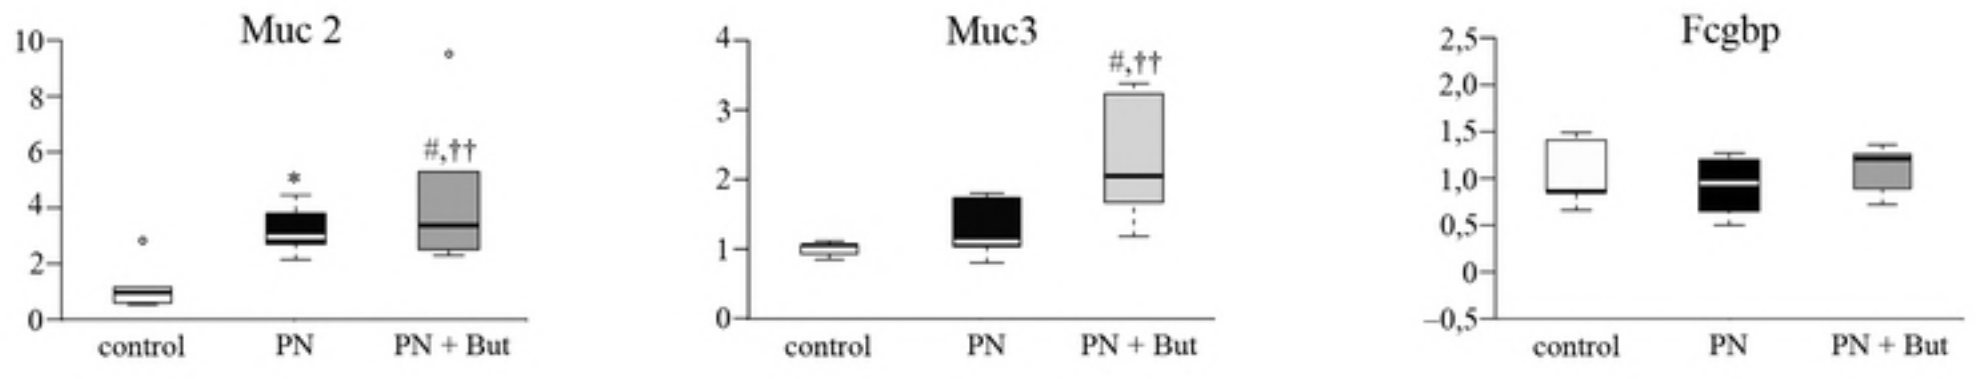

bioRxiv preprint doi: <https://doi.org/10.1101/443978>; this version posted October 15, 2018. The copyright holder for this preprint (which was not certified by peer review) is the author/funder, who has granted bioRxiv a license to display the preprint in perpetuity. It is made available under aCC-BY 4.0 International license.

Figure 3

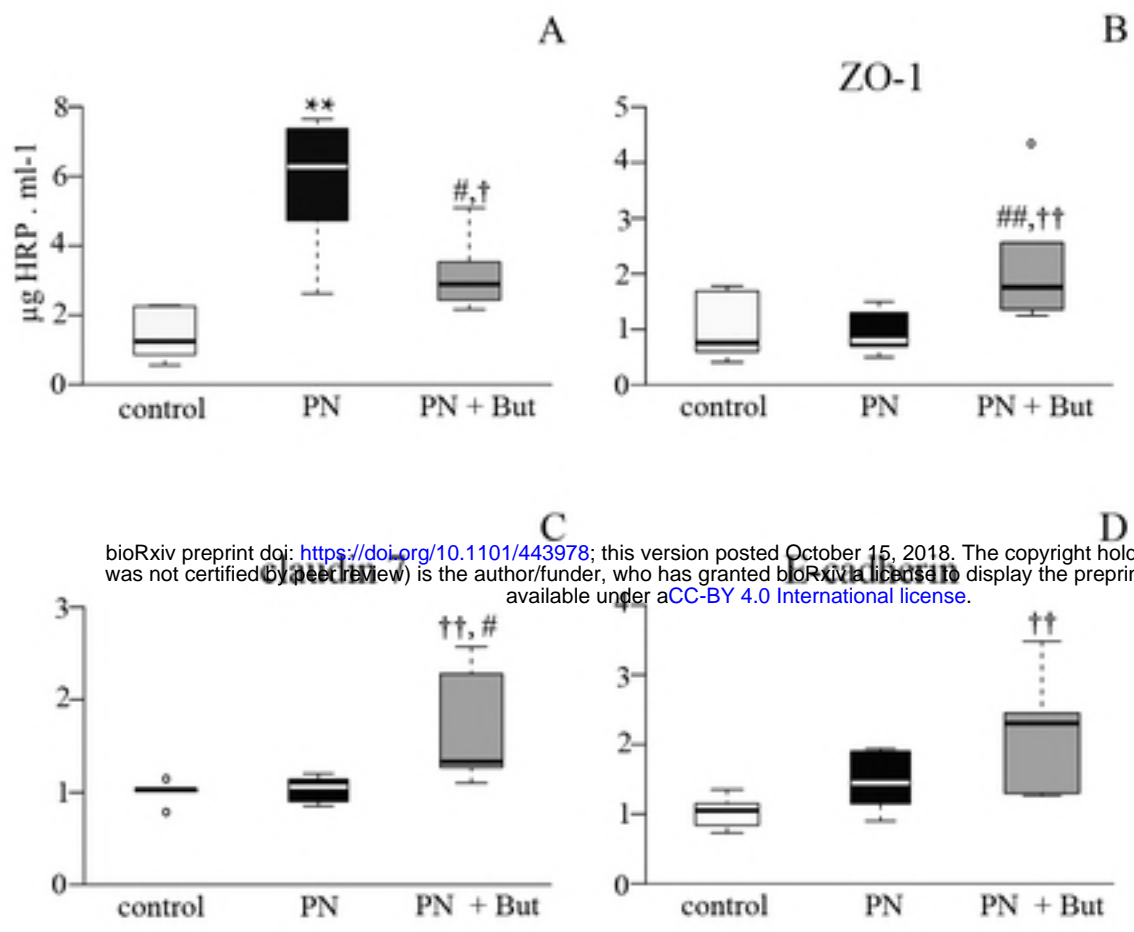

bioRxiv preprint doi: <https://doi.org/10.1101/443978>; this version posted October 15, 2018. The copyright holder for this preprint (which was not certified by peer review) is the author/funder, who has granted bioRxiv a license to display the preprint in perpetuity. It is made available under aCC-BY 4.0 International license.

Figure 4



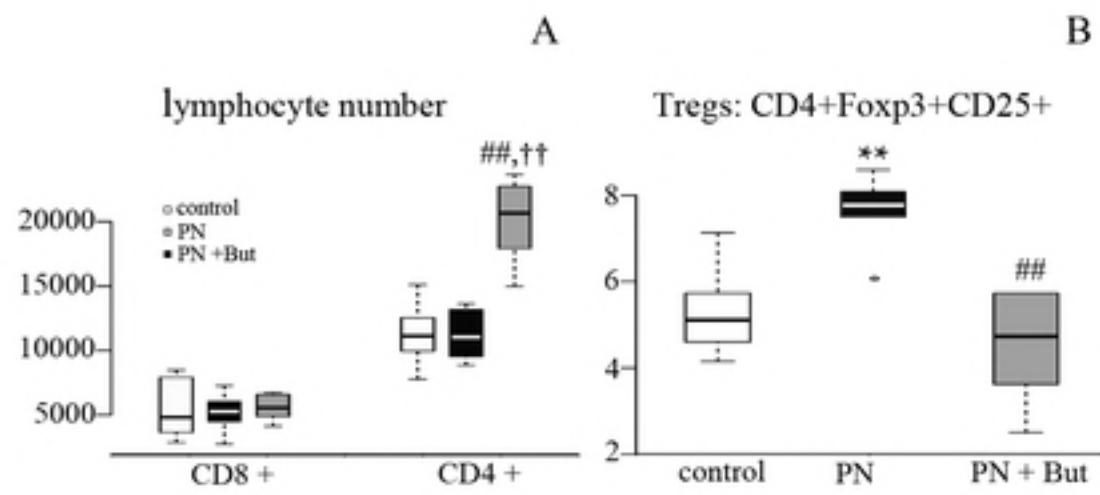

bioRxiv preprint doi: <https://doi.org/10.1101/443978>; this version posted October 15, 2018. The copyright holder for this preprint (which was not certified by peer review) is the author/funder, who has granted bioRxiv a license to display the preprint in perpetuity. It is made available under aCC-BY 4.0 International license.

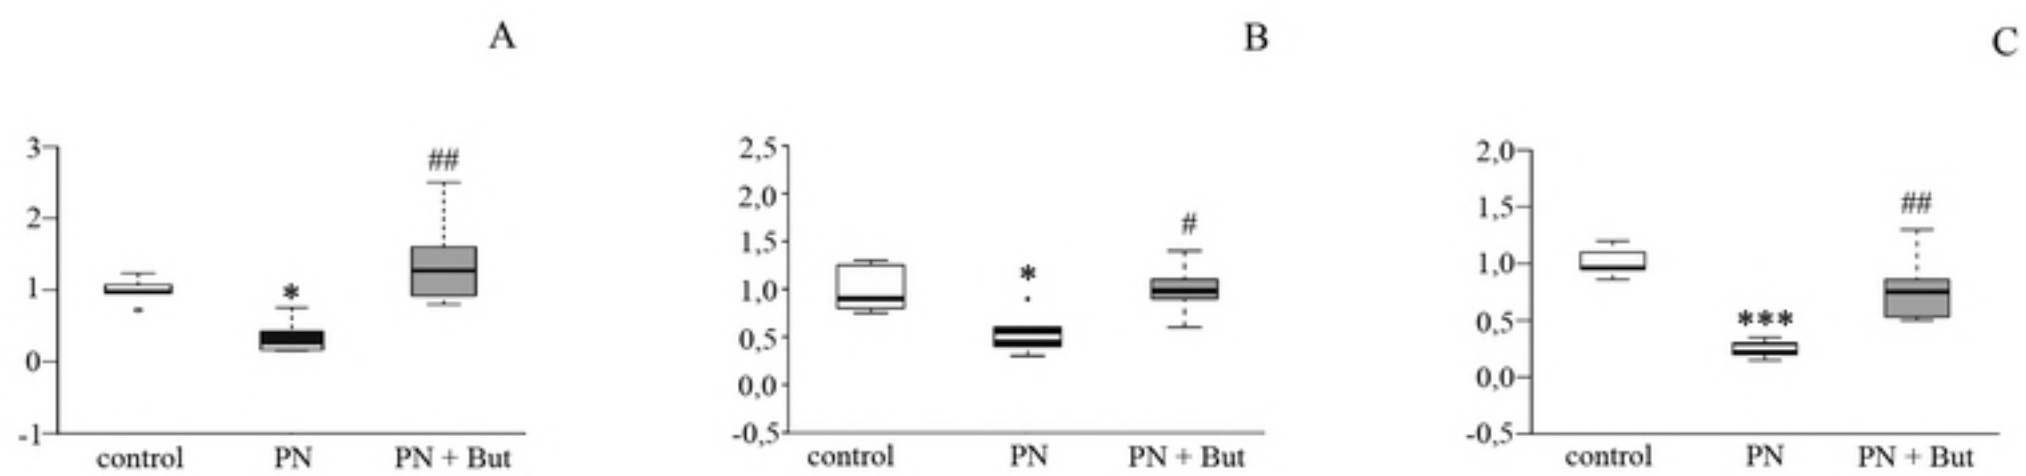

bioRxiv preprint doi: <https://doi.org/10.1101/443978>; this version posted October 15, 2018. The copyright holder for this preprint (which was not certified by peer review) is the author/funder, who has granted bioRxiv a license to display the preprint in perpetuity. It is made available under aCC-BY 4.0 International license.

Figure 6

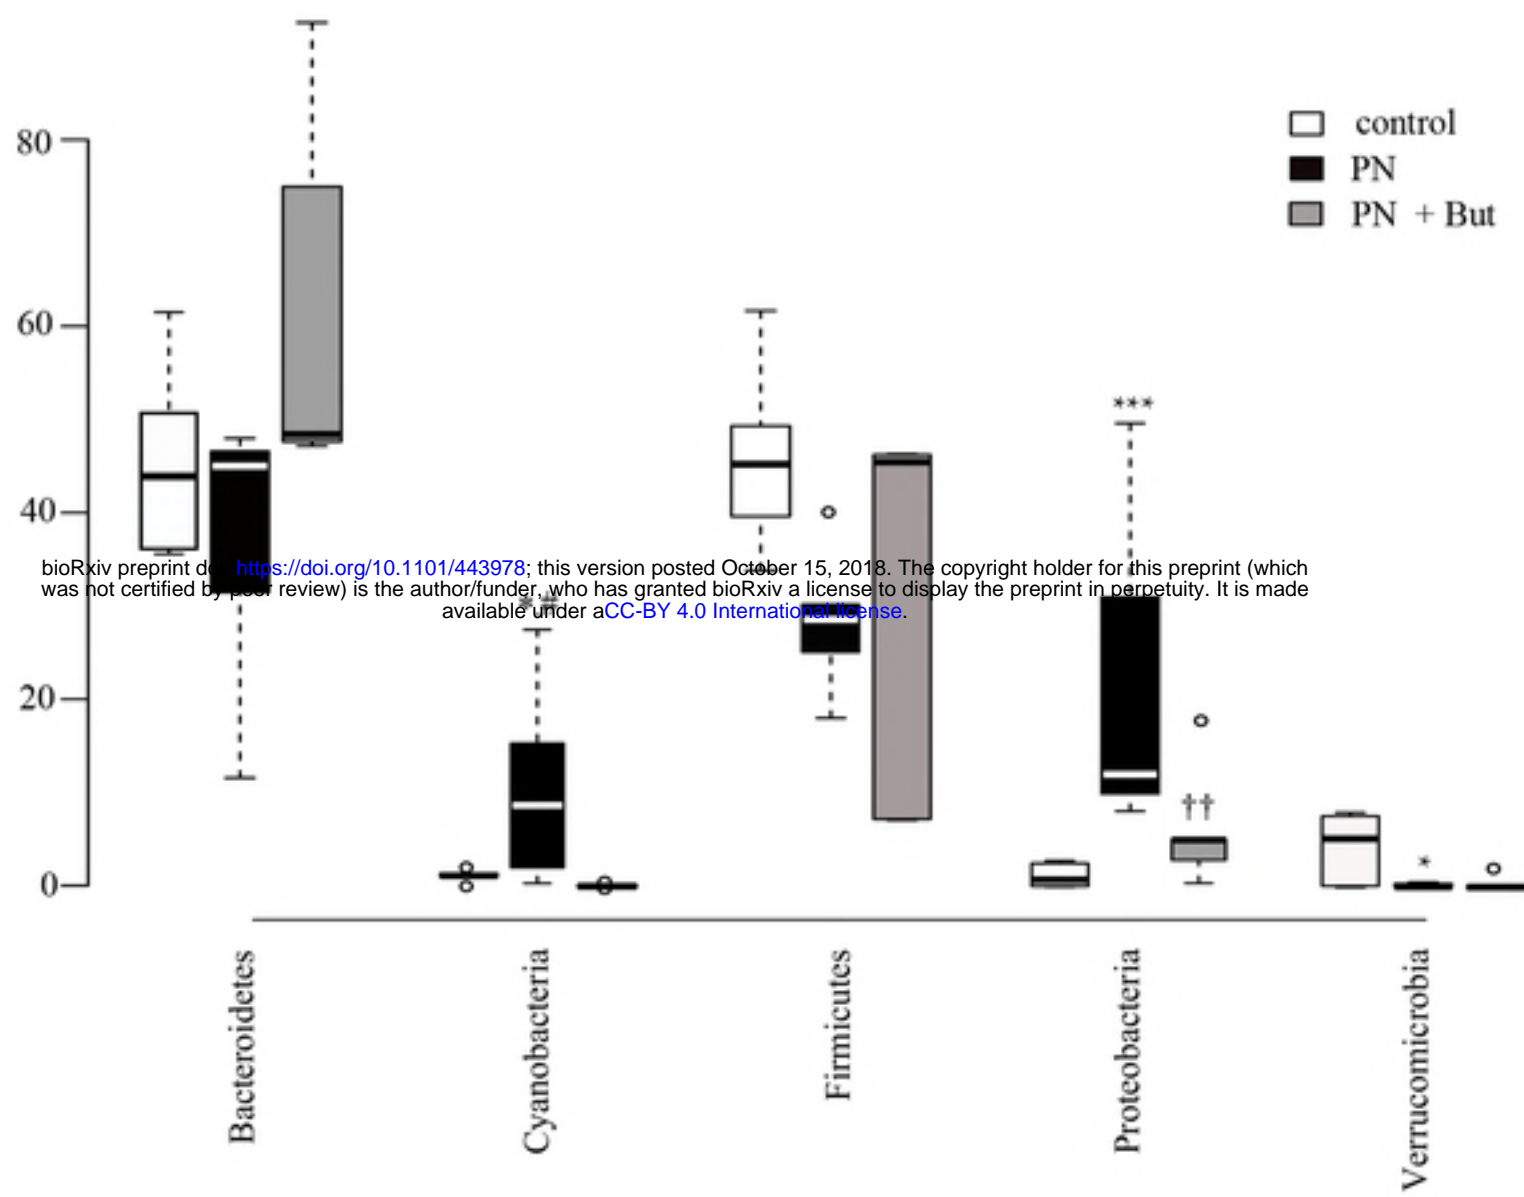

Figure 7

- p < 0.1 PN vs control
- p < 0.1 PN + But vs control
- p < 0.1 PN vs PN + But

bioRxiv preprint doi: <https://doi.org/10.1101/443978>; this version posted October 15, 2018. The copyright holder for this preprint (which was not certified by peer review) is the author/funder, who has granted bioRxiv a license to display the preprint in perpetuity. It is made available under aCC-BY 4.0 International license.

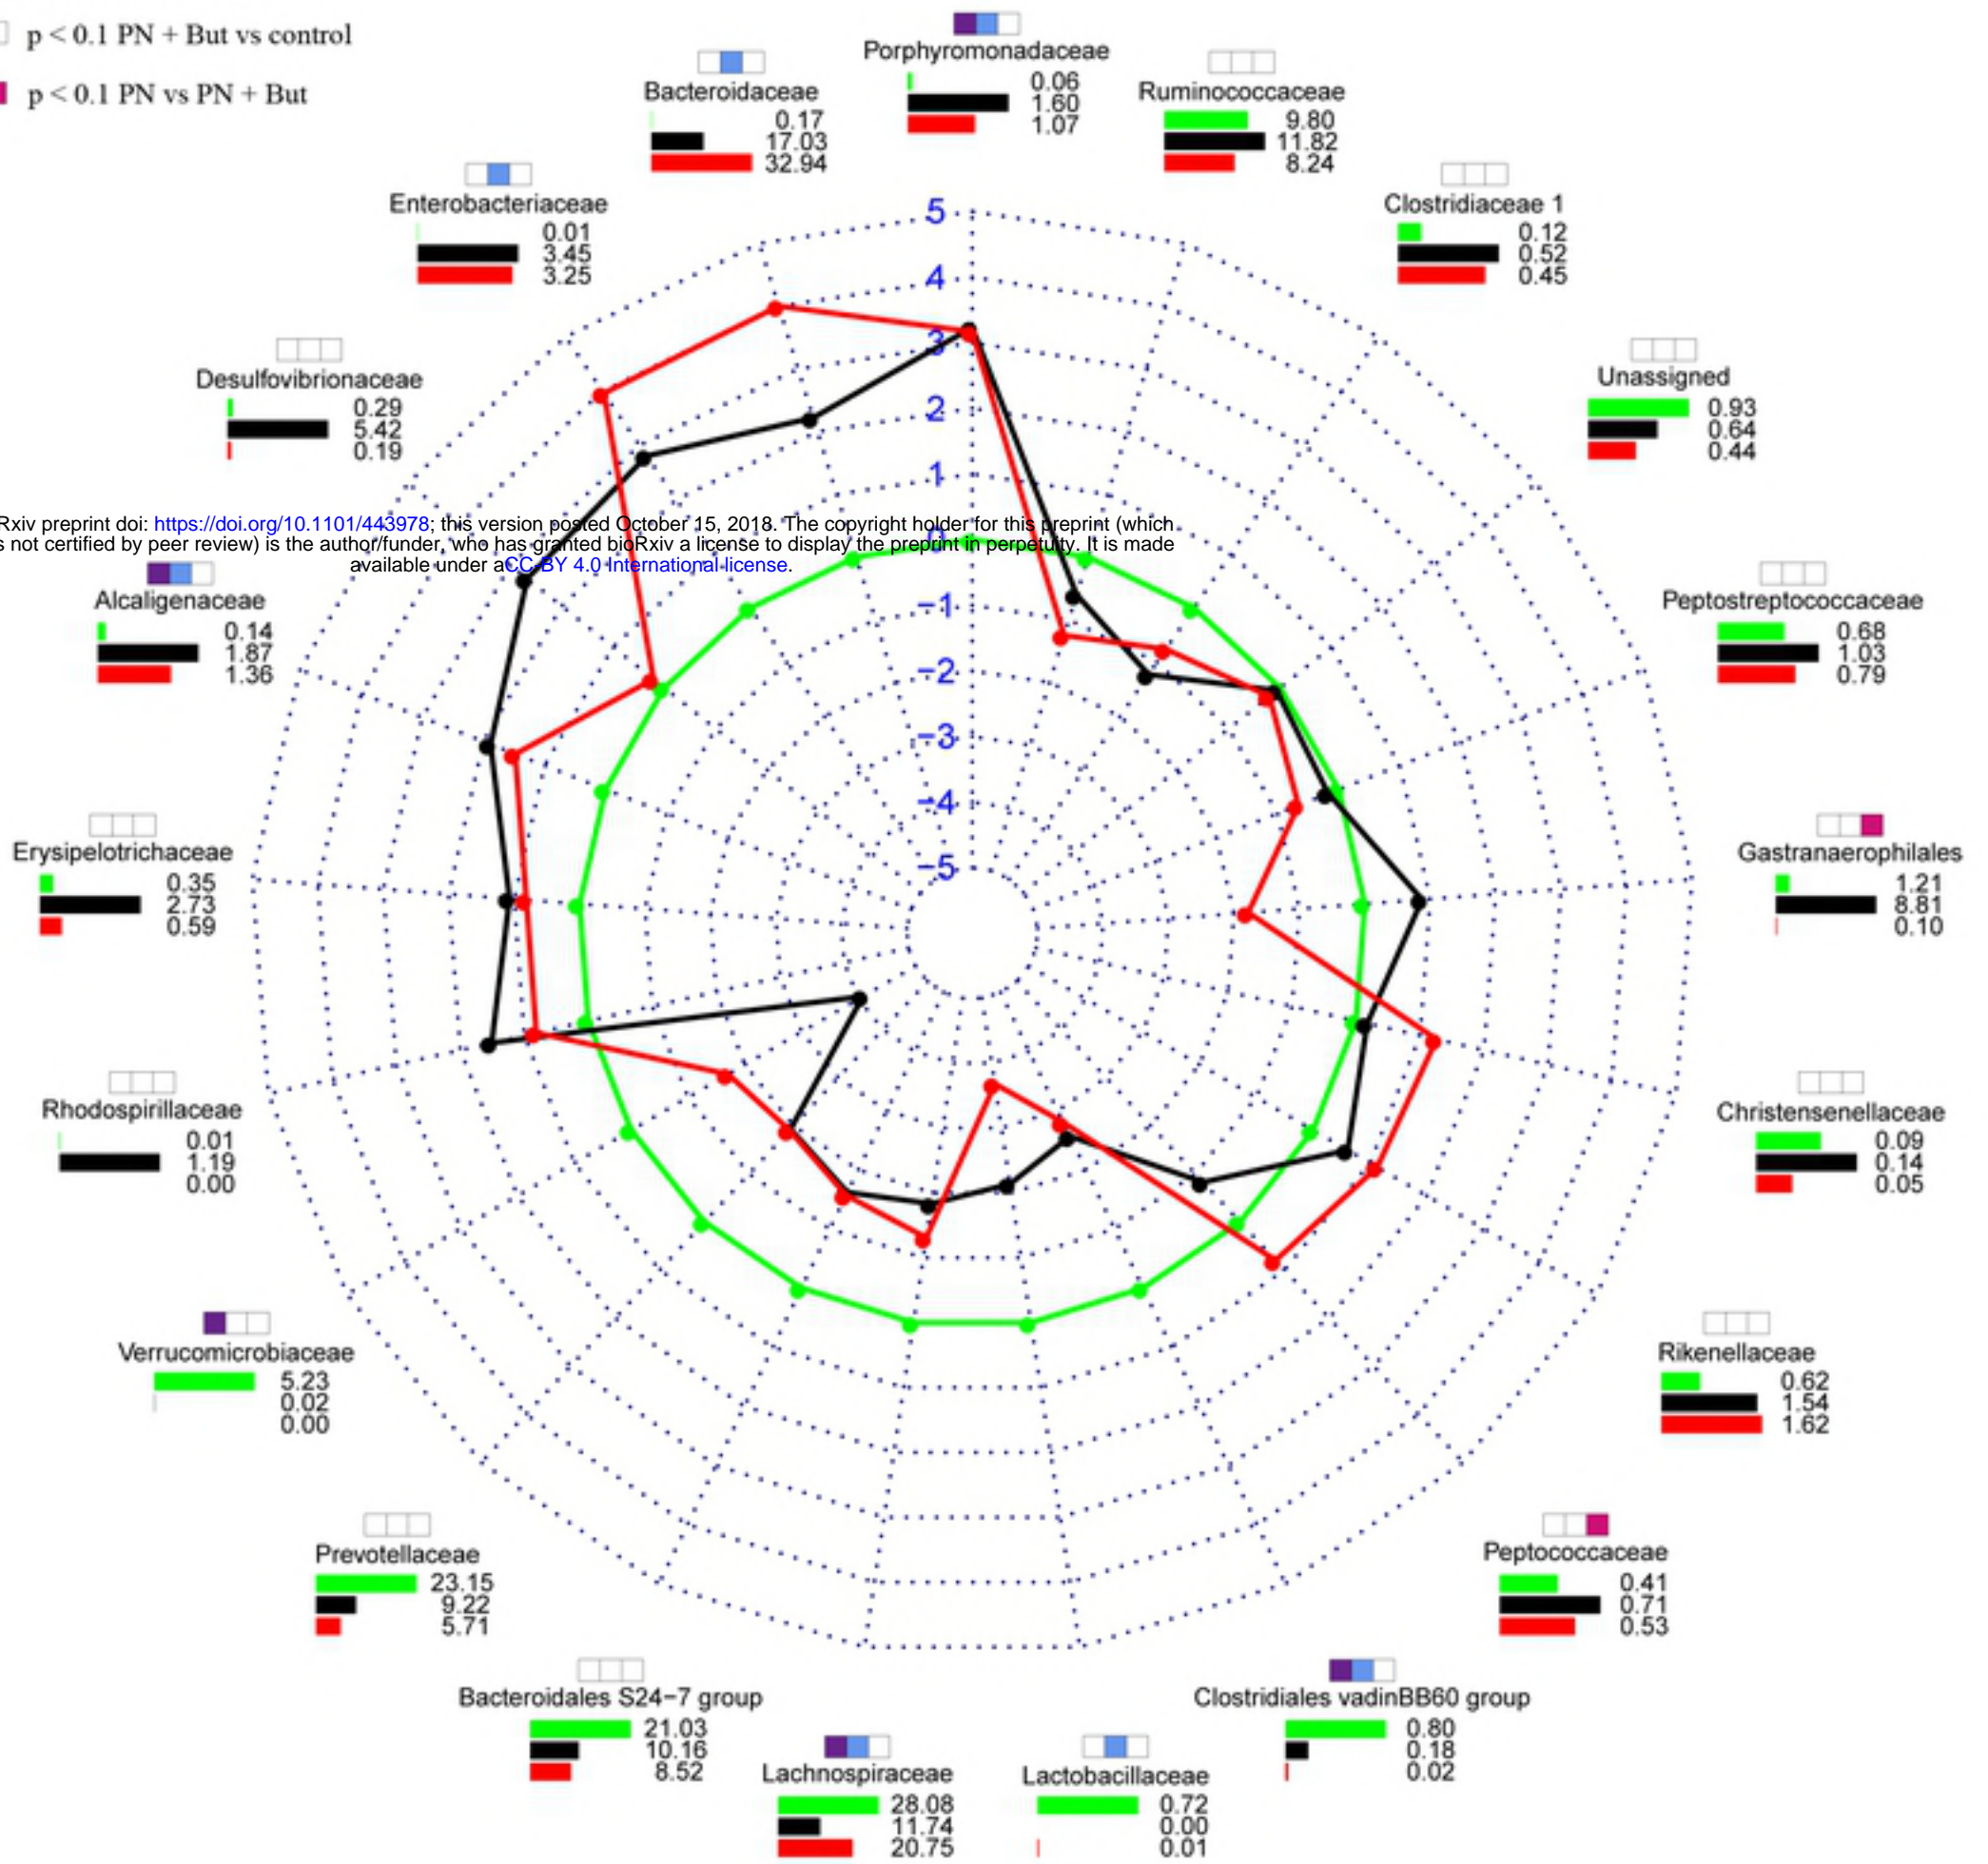

Figure 8

**A**

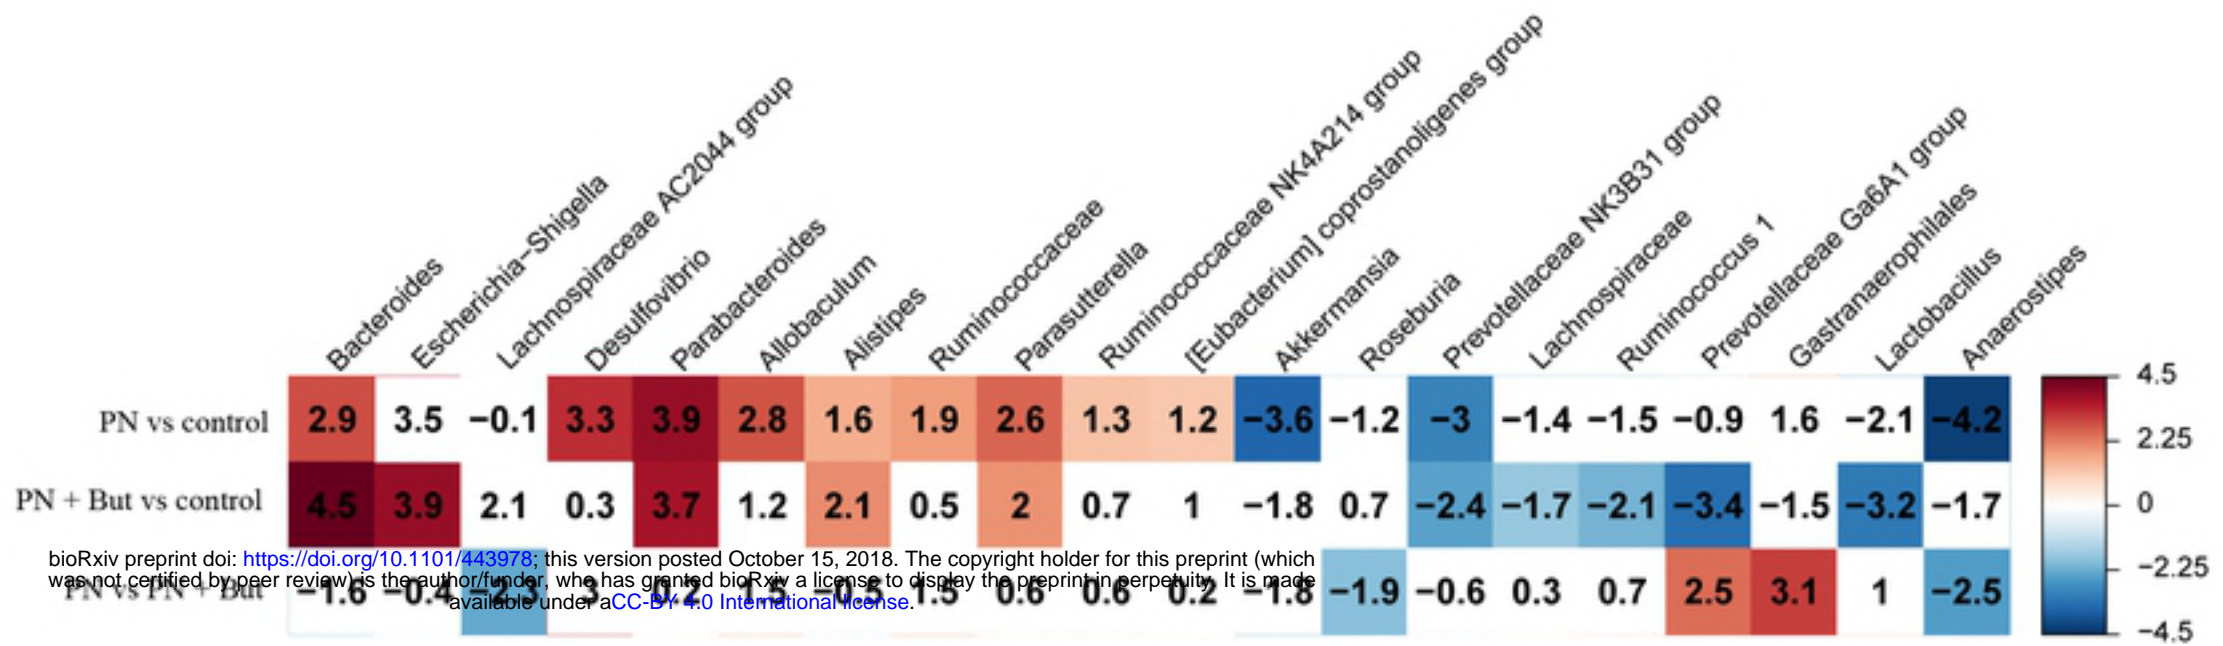

**B**

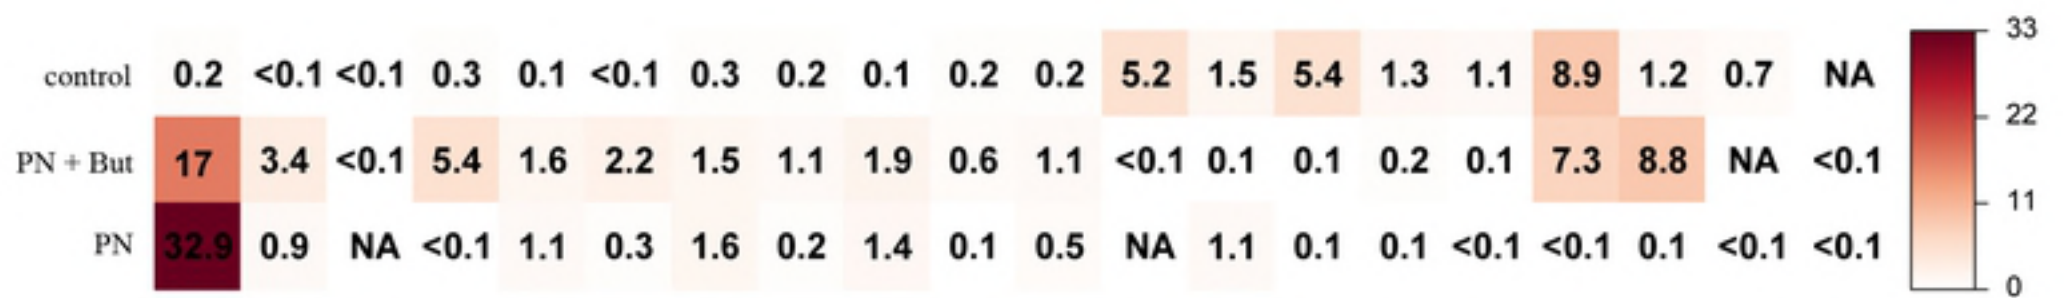

Figure 9
